# Supplementary material
Source: HighWire-hosted journal article supplement (https://bmjopen.bmj.com/content/13/1/e062562)
Supplement: inline-supplementary-material-1 [file inline-supplementary-material-1.pdf]

### Supplementary file 1 – Sample size calculations and sampling frame

The sample size calculation for reliability is based on a confidence interval (CI) approach and the desired accuracy for the lower bound of the CI for the ICC estimates. In an Analysis of Variance (ANOVA) with 2-way random effects on a single score with 2 observations per subject (following Shrout and Fleiss, 1979) (27) and with a two-sided 95% confidence interval and an expected ICC of 0.875, the lower confidence interval for the inter-rater reliability sample (N=90) = 0.852. With the same parameters but an expected ICC of 0.90 the lower confidence interval for the test-retest reliability sample (N=50) is 0.830. We expect the ICC to be higher for the test-retest reliability than the inter-rater reliability as inter-rater estimates contain all the sources of error in the test-retest estimates, plus additional error between assessors (14).

To assess concurrent validity, a sample size of 150 per site produces a two-sided 95% CI 0.15-0.44, when the estimate of Pearson's product-moment correlation is 0.30, with an equal spread of participants tested across age and sex. The CI will be narrower when the data are combined across all seven countries. To assess predictive validity a sample size of 404 produces a two-sided 95% CI 0.65-0.75 when the estimate of Pearson's product-moment correlation is 0.70 between individual scores at baseline and at the 6-month follow-up. Allowing 20% dropout at follow up, a sample size of approximately 500 participants is required.

**Table S1. Sampling Frame**

Sample size per site by age and sex for total population (n=1248) which includes a minimum subsample of healthy 'reference' children (n=522)

| Age (Days) | Sex    | Total Sample size | Minimum sub-sample of reference children | Predictive validity sample (6-month follow-up; age at baseline) | Reliability: Inter-rater | Reliability: Test-Retest | Concurrent validity |
|------------|--------|-------------------|------------------------------------------|-----------------------------------------------------------------|--------------------------|--------------------------|---------------------|
| 15-30      | Male   | 40                | 20                                       | 8                                                               | 2                        | 1                        | 4                   |
|            | Female | 40                | 20                                       | 8                                                               | 2                        | 1                        | 2                   |
| 31-61      | Male   | 40                | 12                                       | 8                                                               | 1                        | 1                        | 2                   |
|            | Female | 40                | 12                                       | 8                                                               | 2                        | 1                        | 2                   |
| 62-91      | Male   | 40                | 10                                       | 8                                                               | 2                        | 1                        | 2                   |
|            | Female | 40                | 10                                       | 8                                                               | 1                        | 0                        | 4                   |
| 92-122     | Male   | 36                | 9                                        | 8                                                               | 2                        | 1                        | 2                   |
|            | Female | 36                | 9                                        | 8                                                               | 2                        | 1                        | 2                   |
| 123-152    | Male   | 32                | 8                                        | 8                                                               | 1                        | 1                        | 2                   |
|            | Female | 32                | 8                                        | 8                                                               | 2                        | 1                        | 2                   |

|         |        |    |   |   |   |   |   |
|---------|--------|----|---|---|---|---|---|
| 153-183 | Male   | 28 | 8 | 8 | 1 | 0 | 4 |
|         | Female | 28 | 8 | 8 | 1 | 1 | 2 |
| 184-213 | Male   | 25 | 7 | 8 | 2 | 1 | 2 |
|         | Female | 25 | 7 | 8 | 1 | 0 | 2 |
| 214-244 | Male   | 23 | 7 | 8 | 1 | 1 | 2 |
|         | Female | 23 | 7 | 8 | 2 | 1 | 4 |
| 245-274 | Male   | 21 | 6 | 8 | 1 | 1 | 2 |
|         | Female | 21 | 6 | 8 | 1 | 1 | 2 |
| 275-304 | Male   | 19 | 6 | 8 | 2 | 0 | 2 |
|         | Female | 19 | 6 | 8 | 1 | 1 | 2 |
| 305-335 | Male   | 17 | 6 | 8 | 1 | 1 | 4 |
|         | Female | 17 | 6 | 8 | 2 | 0 | 2 |
| 336-365 | Male   | 16 | 6 | 7 | 1 | 1 | 2 |
|         | Female | 16 | 6 | 7 | 1 | 1 | 2 |
| 366-396 | Male   | 14 | 6 | 7 | 2 | 1 | 2 |
|         | Female | 14 | 6 | 7 | 1 | 1 | 4 |
| 397-426 | Male   | 13 | 6 | 7 | 1 | 0 | 2 |
|         | Female | 13 | 6 | 7 | 2 | 1 | 2 |
| 427-457 | Male   | 12 | 5 | 7 | 1 | 1 | 2 |
|         | Female | 12 | 5 | 7 | 1 | 0 | 2 |
| 458-487 | Male   | 11 | 5 | 7 | 2 | 1 | 4 |
|         | Female | 11 | 5 | 7 | 1 | 1 | 2 |
| 488-517 | Male   | 11 | 5 | 7 | 1 | 1 | 2 |
|         | Female | 11 | 5 | 7 | 2 | 1 | 2 |
| 518-548 | Male   | 10 | 5 | 7 | 1 | 0 | 2 |
|         | Female | 10 | 5 | 7 | 1 | 1 | 4 |
| 549-578 | Male   | 9  | 5 | 7 | 2 | 1 | 2 |
|         | Female | 9  | 5 | 7 | 1 | 0 | 2 |
| 579-609 | Male   | 9  | 5 | 7 | 1 | 1 | 2 |
|         | Female | 9  | 5 | 7 | 2 | 1 | 2 |
| 610-639 | Male   | 9  | 5 | 7 | 1 | 1 | 4 |
|         | Female | 9  | 5 | 7 | 1 | 1 | 2 |
| 640-670 | Male   | 9  | 5 | 7 | 2 | 0 | 2 |
|         | Female | 9  | 5 | 7 | 1 | 1 | 2 |
| 671-700 | Male   | 9  | 5 | 7 | 1 | 1 | 2 |
|         | Female | 9  | 5 | 7 | 2 | 0 | 4 |
| 701-730 | Male   | 9  | 5 | 7 | 1 | 1 | 2 |
|         | Female | 9  | 5 | 7 | 1 | 1 | 2 |
| 731-761 | Male   | 9  | 5 | 7 | 2 | 1 | 2 |
|         | Female | 9  | 5 | 7 | 1 | 1 | 2 |
| 762-791 | Male   | 9  | 5 | 6 | 1 | 0 | 4 |
|         | Female | 9  | 5 | 6 | 2 | 1 | 2 |
| 792-822 | Male   | 9  | 5 | 6 | 1 | 1 | 2 |
|         | Female | 9  | 5 | 6 | 1 | 0 | 2 |
| 823-852 | Male   | 9  | 5 | 6 | 2 | 1 | 2 |
|         | Female | 9  | 5 | 6 | 1 | 1 | 2 |

|              |        |      |     |     |     |      |        |
|--------------|--------|------|-----|-----|-----|------|--------|
| 853-883      | Male   | 9    | 5   | 6   | 1   | 1    | 2      |
|              | Female | 9    | 5   | 6   | 2   | 1    | 2      |
| 884-913      | Male   | 9    | 5   | 6   | 1   | 0    | 2      |
|              | Female | 9    | 5   | 6   | 1   | 1    | 2      |
| 914-944      | Male   | 9    | 5   | 6   | 2   | 1    | 2      |
|              | Female | 9    | 5   | 6   | 1   | 0    | 2      |
| 945-974      | Male   | 9    | 5   | 6   | 1   | 1    | 2      |
|              | Female | 9    | 5   | 6   | 2   | 1    | 2      |
| 975-1004     | Male   | 9    | 5   | 6   | 1   | 1    | 2      |
|              | Female | 9    | 5   | 6   | 1   | 1    | 2      |
| 1005-1035    | Male   | 9    | 5   | 6   | 2   | 0    | 2      |
|              | Female | 9    | 5   | 6   | 1   | 1    | 2      |
| 1036-1065    | Male   | 9    | 5   | 6   | 1   | 1    | 2      |
|              | Female | 9    | 5   | 6   | 2   | 0    | 2      |
| 1066-1096    | Male   | 9    | 5   | 6   | 1   | 1    | 2      |
|              | Female | 9    | 5   | 6   | 1   | 1    | 2      |
| 1097-1126    | Male   | 9    | 5   | 0   | 0   | 0    | 0      |
|              | Female | 9    | 5   | 0   | 0   | 0    | 0      |
| 1127-1157    | Male   | 9    | 5   | 0   | 0   | 0    | 0      |
|              | Female | 9    | 5   | 0   | 0   | 0    | 0      |
| 1158-1187    | Male   | 9    | 5   | 0   | 0   | 0    | 0      |
|              | Female | 9    | 5   | 0   | 0   | 0    | 0      |
| 1188-1218    | Male   | 9    | 6   | 0   | 0   | 0    | 0      |
|              | Female | 9    | 6   | 0   | 0   | 0    | 0      |
| 1219-1248    | Male   | 9    | 6   | 0   | 0   | 0    | 0      |
|              | Female | 9    | 6   | 0   | 0   | 0    | 0      |
| 1249-1279    | Male   | 9    | 7   | 0   | 0   | 0    | 0      |
|              | Female | 9    | 7   | 0   | 0   | 0    | 0      |
| <b>TOTAL</b> |        | 1248 | 522 | 504 | *99 | **55 | ***166 |

\*90 + ~10% Loss to follow up = 99; \*\*50 + ~10% Loss to follow up = 55; \*\*\*150 + ~10% Loss to follow up = 166
